# Supplementary material for: A Comparative Genomic Analysis Provides Novel Insights Into the Ecological Success of the Monophasic Salmonella Serovar 4,[5],12:i:-
Source: Front Microbiol. 2018 Apr 17;9:715. doi: 10.3389/fmicb.2018.00715 (PMC5913373; doi:10.3389/fmicb.2018.00715)
Supplement: Supplementary file 5 [file DataSheet5.XLSX]

## Sheet: no cluster
TITLE: A comparative genomic analysis provides novel insights into the ecological success of the monophasic Salmonella serovar 4,[5],12:i:-
E. Mastrorilli, D. Pietrucci, L. Barco, S. Ammendola,, S. Petrin, A. Longo, C. Mantovani, A. Battistoni, A. Ricci, A. Desideri, C. Losasso
Supplemental_Table_S5. Xls GO terms in clusters
Entry	Entry name	Status	Protein names	Gene names	Length	Function [CC]	Gene ontology (biological process)	Gene ontology (molecular function)	Gene ontology (cellular component)	Gene ontology (GO)	yourlist:M2017062883C3DD8CE55183C76102DC5D3A26728BD57B3E7	Organism
A0A0D6ICS5	A0A0D6ICS5_SALTM	unreviewed	Arylsulfate sulfotransferase AssT (EC 2.8.2.22) (Aryl sulfotransferase AssT)	assT DD95_20310	598	FUNCTION: Catalyzes the transfer of sulfuryl groups between phenolic compounds. {ECO:0000256|HAMAP-Rule:MF_00933}.		arylsulfate sulfotransferase activity [GO:0047686]; aryl sulfotransferase activity [GO:0004062]	periplasmic space [GO:0042597]	periplasmic space [GO:0042597]; aryl sulfotransferase activity [GO:0004062]; arylsulfate sulfotransferase activity [GO:0047686]		Salmonella typhimurium
Q8GHE7	Q8GHE7_SALTM	unreviewed	Arylsulfate sulfotransferase AssT (EC 2.8.2.22) (Aryl sulfotransferase AssT)	astJ assT	598	FUNCTION: Catalyzes the transfer of sulfuryl groups between phenolic compounds. {ECO:0000256|HAMAP-Rule:MF_00933}.		arylsulfate sulfotransferase activity [GO:0047686]; aryl sulfotransferase activity [GO:0004062]	periplasmic space [GO:0042597]	periplasmic space [GO:0042597]; aryl sulfotransferase activity [GO:0004062]; arylsulfate sulfotransferase activity [GO:0047686]		Salmonella typhimurium
A0A0D6IM43	A0A0D6IM43_SALTM	unreviewed	HTH-type transcriptional regulator YidZ	yidZ DD95_19385	319	FUNCTION: Involved in anaerobic NO protection. {ECO:0000256|HAMAP-Rule:MF_01607}.	transcription, DNA-templated [GO:0006351]	DNA binding [GO:0003677]; transcription factor activity, sequence-specific DNA binding [GO:0003700]		DNA binding [GO:0003677]; transcription factor activity, sequence-specific DNA binding [GO:0003700]; transcription, DNA-templated [GO:0006351]		Salmonella typhimurium
A0A0J0WVH6	A0A0J0WVH6_SALTM	unreviewed	Nucleoside permease NupG	nupG DD95_12065	418	FUNCTION: Broad-specificity transporter of purine and pyrimidine nucleosides. Driven by a proton motive force. {ECO:0000256|HAMAP-Rule:MF_02049}.		nucleoside:proton symporter activity [GO:0015506]	integral component of plasma membrane [GO:0005887]	integral component of plasma membrane [GO:0005887]; nucleoside:proton symporter activity [GO:0015506]		Salmonella typhimurium
A0A0D6FCM1	A0A0D6FCM1_SALTM	unreviewed	Cytochrome c-type biogenesis protein CcmE (Cytochrome c maturation protein E) (Heme chaperone CcmE)	ccmE cycJ DD95_18290	159	FUNCTION: Heme chaperone required for the biogenesis of c-type cytochromes. Transiently binds heme delivered by CcmC and transfers the heme to apo-cytochromes in a process facilitated by CcmF and CcmH. {ECO:0000256|HAMAP-Rule:MF_01959, ECO:0000256|SAAS:SAAS00651925}.	cytochrome complex assembly [GO:0017004]; protein-heme linkage [GO:0017003]	metal ion binding [GO:0046872]	integral component of membrane [GO:0016021]; plasma membrane [GO:0005886]	integral component of membrane [GO:0016021]; plasma membrane [GO:0005886]; metal ion binding [GO:0046872]; cytochrome complex assembly [GO:0017004]; protein-heme linkage [GO:0017003]		Salmonella typhimurium
A0A0D6HJJ4	A0A0D6HJJ4_SALTM	unreviewed	HTH-type transcriptional regulator SgrR	sgrR DD95_09925	552	FUNCTION: Activates the small RNA gene sgrS under glucose-phosphate stress conditions as well as yfdZ. Represses its own transcription under both stress and non-stress conditions. Might act as a sensor of the intracellular accumulation of phosphoglucose by binding these molecules in its C-terminal solute-binding domain. {ECO:0000256|HAMAP-Rule:MF_01449}.	negative regulation of transcription, DNA-templated [GO:0045892]; positive regulation of transcription, DNA-templated [GO:0045893]; transcription, DNA-templated [GO:0006351]	DNA binding [GO:0003677]		DNA binding [GO:0003677]; negative regulation of transcription, DNA-templated [GO:0045892]; positive regulation of transcription, DNA-templated [GO:0045893]; transcription, DNA-templated [GO:0006351]		Salmonella typhimurium
A0A0J0W615	A0A0J0W615_SALTM	unreviewed	Cytochrome c biogenesis ATP-binding export protein CcmA (EC 3.6.3.41) (Heme exporter protein A)	ccmA	205	FUNCTION: Part of the ABC transporter complex CcmAB involved in the biogenesis of c-type cytochromes; once thought to export heme, this seems not to be the case, but its exact role is uncertain. Responsible for energy coupling to the transport system. {ECO:0000256|HAMAP-Rule:MF_01707, ECO:0000256|SAAS:SAAS00381217}.	cytochrome complex assembly [GO:0017004]	ATP binding [GO:0005524]; heme-transporting ATPase activity [GO:0015439]; protoheme IX ABC transporter activity [GO:0103115]	outer membrane-bounded periplasmic space [GO:0030288]; plasma membrane [GO:0005886]	outer membrane-bounded periplasmic space [GO:0030288]; plasma membrane [GO:0005886]; ATP binding [GO:0005524]; heme-transporting ATPase activity [GO:0015439]; protoheme IX ABC transporter activity [GO:0103115]; cytochrome complex assembly [GO:0017004]		Salmonella typhimurium
O30354	O30354_SALTM	unreviewed	Exodeoxyribonuclease VIII	recE	975			double-stranded DNA 5'-3' exodeoxyribonuclease activity [GO:0051908]		double-stranded DNA 5'-3' exodeoxyribonuclease activity [GO:0051908]		Salmonella typhimurium
A0A068EW63	A0A068EW63_SALTM	unreviewed	Flagellin (Fragment)	fliC	188		bacterial-type flagellum-dependent cell motility [GO:0071973]	structural molecule activity [GO:0005198]		structural molecule activity [GO:0005198]; bacterial-type flagellum-dependent cell motility [GO:0071973]		Salmonella typhimurium
A0A068JI40	A0A068JI40_SALTM	unreviewed	Flagellin (Fragment)	fliC	186		bacterial-type flagellum-dependent cell motility [GO:0071973]	structural molecule activity [GO:0005198]		structural molecule activity [GO:0005198]; bacterial-type flagellum-dependent cell motility [GO:0071973]		Salmonella typhimurium
A0FLH6	A0FLH6_SALTM	unreviewed	Flagellin	fliC	483	FUNCTION: Flagellin is the subunit protein which polymerizes to form the filaments of bacterial flagella. {ECO:0000256|RuleBase:RU362073}.	bacterial-type flagellum-dependent cell motility [GO:0071973]	structural molecule activity [GO:0005198]	bacterial-type flagellum filament [GO:0009420]; extracellular region [GO:0005576]	bacterial-type flagellum filament [GO:0009420]; extracellular region [GO:0005576]; structural molecule activity [GO:0005198]; bacterial-type flagellum-dependent cell motility [GO:0071973]		Salmonella typhimurium
A0FLH7	A0FLH7_SALTM	unreviewed	Flagellin	fliC	483	FUNCTION: Flagellin is the subunit protein which polymerizes to form the filaments of bacterial flagella. {ECO:0000256|RuleBase:RU362073}.	bacterial-type flagellum-dependent cell motility [GO:0071973]	structural molecule activity [GO:0005198]	bacterial-type flagellum filament [GO:0009420]; extracellular region [GO:0005576]	bacterial-type flagellum filament [GO:0009420]; extracellular region [GO:0005576]; structural molecule activity [GO:0005198]; bacterial-type flagellum-dependent cell motility [GO:0071973]		Salmonella typhimurium
A0FLH8	A0FLH8_SALTM	unreviewed	Flagellin	fliC	482	FUNCTION: Flagellin is the subunit protein which polymerizes to form the filaments of bacterial flagella. {ECO:0000256|RuleBase:RU362073}.	bacterial-type flagellum-dependent cell motility [GO:0071973]	structural molecule activity [GO:0005198]	bacterial-type flagellum filament [GO:0009420]; extracellular region [GO:0005576]	bacterial-type flagellum filament [GO:0009420]; extracellular region [GO:0005576]; structural molecule activity [GO:0005198]; bacterial-type flagellum-dependent cell motility [GO:0071973]		Salmonella typhimurium
A0FLH9	A0FLH9_SALTM	unreviewed	Flagellin	fliC	479	FUNCTION: Flagellin is the subunit protein which polymerizes to form the filaments of bacterial flagella. {ECO:0000256|RuleBase:RU362073}.	bacterial-type flagellum-dependent cell motility [GO:0071973]	structural molecule activity [GO:0005198]	bacterial-type flagellum filament [GO:0009420]; extracellular region [GO:0005576]	bacterial-type flagellum filament [GO:0009420]; extracellular region [GO:0005576]; structural molecule activity [GO:0005198]; bacterial-type flagellum-dependent cell motility [GO:0071973]		Salmonella typhimurium
A0FLI0	A0FLI0_SALTM	unreviewed	Flagellin	fliC	478	FUNCTION: Flagellin is the subunit protein which polymerizes to form the filaments of bacterial flagella. {ECO:0000256|RuleBase:RU362073}.	bacterial-type flagellum-dependent cell motility [GO:0071973]	structural molecule activity [GO:0005198]	bacterial-type flagellum filament [GO:0009420]; extracellular region [GO:0005576]	bacterial-type flagellum filament [GO:0009420]; extracellular region [GO:0005576]; structural molecule activity [GO:0005198]; bacterial-type flagellum-dependent cell motility [GO:0071973]		Salmonella typhimurium
A0FLI1	A0FLI1_SALTM	unreviewed	Flagellin	fliC	477	FUNCTION: Flagellin is the subunit protein which polymerizes to form the filaments of bacterial flagella. {ECO:0000256|RuleBase:RU362073}.	bacterial-type flagellum-dependent cell motility [GO:0071973]	structural molecule activity [GO:0005198]	bacterial-type flagellum filament [GO:0009420]; extracellular region [GO:0005576]	bacterial-type flagellum filament [GO:0009420]; extracellular region [GO:0005576]; structural molecule activity [GO:0005198]; bacterial-type flagellum-dependent cell motility [GO:0071973]		Salmonella typhimurium
A0FLI2	A0FLI2_SALTM	unreviewed	Flagellin	fliC	477	FUNCTION: Flagellin is the subunit protein which polymerizes to form the filaments of bacterial flagella. {ECO:0000256|RuleBase:RU362073}.	bacterial-type flagellum-dependent cell motility [GO:0071973]	structural molecule activity [GO:0005198]	bacterial-type flagellum filament [GO:0009420]; extracellular region [GO:0005576]	bacterial-type flagellum filament [GO:0009420]; extracellular region [GO:0005576]; structural molecule activity [GO:0005198]; bacterial-type flagellum-dependent cell motility [GO:0071973]		Salmonella typhimurium
A0FLI3	A0FLI3_SALTM	unreviewed	Flagellin	fliC	477	FUNCTION: Flagellin is the subunit protein which polymerizes to form the filaments of bacterial flagella. {ECO:0000256|RuleBase:RU362073}.	bacterial-type flagellum-dependent cell motility [GO:0071973]	structural molecule activity [GO:0005198]	bacterial-type flagellum filament [GO:0009420]; extracellular region [GO:0005576]	bacterial-type flagellum filament [GO:0009420]; extracellular region [GO:0005576]; structural molecule activity [GO:0005198]; bacterial-type flagellum-dependent cell motility [GO:0071973]		Salmonella typhimurium
A0FLI4	A0FLI4_SALTM	unreviewed	Flagellin	fliC	475	FUNCTION: Flagellin is the subunit protein which polymerizes to form the filaments of bacterial flagella. {ECO:0000256|RuleBase:RU362073}.	bacterial-type flagellum-dependent cell motility [GO:0071973]	structural molecule activity [GO:0005198]	bacterial-type flagellum filament [GO:0009420]; extracellular region [GO:0005576]	bacterial-type flagellum filament [GO:0009420]; extracellular region [GO:0005576]; structural molecule activity [GO:0005198]; bacterial-type flagellum-dependent cell motility [GO:0071973]		Salmonella typhimurium
A0FLI5	A0FLI5_SALTM	unreviewed	Flagellin	fliC	473	FUNCTION: Flagellin is the subunit protein which polymerizes to form the filaments of bacterial flagella. {ECO:0000256|RuleBase:RU362073}.	bacterial-type flagellum-dependent cell motility [GO:0071973]	structural molecule activity [GO:0005198]	bacterial-type flagellum filament [GO:0009420]; extracellular region [GO:0005576]	bacterial-type flagellum filament [GO:0009420]; extracellular region [GO:0005576]; structural molecule activity [GO:0005198]; bacterial-type flagellum-dependent cell motility [GO:0071973]		Salmonella typhimurium
A0FLI6	A0FLI6_SALTM	unreviewed	Flagellin	fliC	473	FUNCTION: Flagellin is the subunit protein which polymerizes to form the filaments of bacterial flagella. {ECO:0000256|RuleBase:RU362073}.	bacterial-type flagellum-dependent cell motility [GO:0071973]	structural molecule activity [GO:0005198]	bacterial-type flagellum filament [GO:0009420]; extracellular region [GO:0005576]	bacterial-type flagellum filament [GO:0009420]; extracellular region [GO:0005576]; structural molecule activity [GO:0005198]; bacterial-type flagellum-dependent cell motility [GO:0071973]		Salmonella typhimurium
A0FLI7	A0FLI7_SALTM	unreviewed	Flagellin	fliC	470	FUNCTION: Flagellin is the subunit protein which polymerizes to form the filaments of bacterial flagella. {ECO:0000256|RuleBase:RU362073}.	bacterial-type flagellum-dependent cell motility [GO:0071973]	structural molecule activity [GO:0005198]	bacterial-type flagellum filament [GO:0009420]; extracellular region [GO:0005576]	bacterial-type flagellum filament [GO:0009420]; extracellular region [GO:0005576]; structural molecule activity [GO:0005198]; bacterial-type flagellum-dependent cell motility [GO:0071973]		Salmonella typhimurium
A0FLI8	A0FLI8_SALTM	unreviewed	Flagellin	fliC	470	FUNCTION: Flagellin is the subunit protein which polymerizes to form the filaments of bacterial flagella. {ECO:0000256|RuleBase:RU362073}.	bacterial-type flagellum-dependent cell motility [GO:0071973]	structural molecule activity [GO:0005198]	bacterial-type flagellum filament [GO:0009420]; extracellular region [GO:0005576]	bacterial-type flagellum filament [GO:0009420]; extracellular region [GO:0005576]; structural molecule activity [GO:0005198]; bacterial-type flagellum-dependent cell motility [GO:0071973]		Salmonella typhimurium
A0FLI9	A0FLI9_SALTM	unreviewed	Flagellin	fliC	469	FUNCTION: Flagellin is the subunit protein which polymerizes to form the filaments of bacterial flagella. {ECO:0000256|RuleBase:RU362073}.	bacterial-type flagellum-dependent cell motility [GO:0071973]	structural molecule activity [GO:0005198]	bacterial-type flagellum filament [GO:0009420]; extracellular region [GO:0005576]	bacterial-type flagellum filament [GO:0009420]; extracellular region [GO:0005576]; structural molecule activity [GO:0005198]; bacterial-type flagellum-dependent cell motility [GO:0071973]		Salmonella typhimurium
A0FLJ0	A0FLJ0_SALTM	unreviewed	Flagellin	fliC	469	FUNCTION: Flagellin is the subunit protein which polymerizes to form the filaments of bacterial flagella. {ECO:0000256|RuleBase:RU362073}.	bacterial-type flagellum-dependent cell motility [GO:0071973]	structural molecule activity [GO:0005198]	bacterial-type flagellum filament [GO:0009420]; extracellular region [GO:0005576]	bacterial-type flagellum filament [GO:0009420]; extracellular region [GO:0005576]; structural molecule activity [GO:0005198]; bacterial-type flagellum-dependent cell motility [GO:0071973]		Salmonella typhimurium
A0FLJ1	A0FLJ1_SALTM	unreviewed	Flagellin	fliC	466	FUNCTION: Flagellin is the subunit protein which polymerizes to form the filaments of bacterial flagella. {ECO:0000256|RuleBase:RU362073}.	bacterial-type flagellum-dependent cell motility [GO:0071973]	structural molecule activity [GO:0005198]	bacterial-type flagellum filament [GO:0009420]; extracellular region [GO:0005576]	bacterial-type flagellum filament [GO:0009420]; extracellular region [GO:0005576]; structural molecule activity [GO:0005198]; bacterial-type flagellum-dependent cell motility [GO:0071973]		Salmonella typhimurium
A0FLJ2	A0FLJ2_SALTM	unreviewed	Flagellin	fliC	465	FUNCTION: Flagellin is the subunit protein which polymerizes to form the filaments of bacterial flagella. {ECO:0000256|RuleBase:RU362073}.	bacterial-type flagellum-dependent cell motility [GO:0071973]	structural molecule activity [GO:0005198]	bacterial-type flagellum filament [GO:0009420]; extracellular region [GO:0005576]	bacterial-type flagellum filament [GO:0009420]; extracellular region [GO:0005576]; structural molecule activity [GO:0005198]; bacterial-type flagellum-dependent cell motility [GO:0071973]		Salmonella typhimurium
A0FLJ3	A0FLJ3_SALTM	unreviewed	Flagellin	fliC	463	FUNCTION: Flagellin is the subunit protein which polymerizes to form the filaments of bacterial flagella. {ECO:0000256|RuleBase:RU362073}.	bacterial-type flagellum-dependent cell motility [GO:0071973]	structural molecule activity [GO:0005198]	bacterial-type flagellum filament [GO:0009420]; extracellular region [GO:0005576]	bacterial-type flagellum filament [GO:0009420]; extracellular region [GO:0005576]; structural molecule activity [GO:0005198]; bacterial-type flagellum-dependent cell motility [GO:0071973]		Salmonella typhimurium
A0FLJ4	A0FLJ4_SALTM	unreviewed	Flagellin	fliC	462	FUNCTION: Flagellin is the subunit protein which polymerizes to form the filaments of bacterial flagella. {ECO:0000256|RuleBase:RU362073}.	bacterial-type flagellum-dependent cell motility [GO:0071973]	structural molecule activity [GO:0005198]	bacterial-type flagellum filament [GO:0009420]; extracellular region [GO:0005576]	bacterial-type flagellum filament [GO:0009420]; extracellular region [GO:0005576]; structural molecule activity [GO:0005198]; bacterial-type flagellum-dependent cell motility [GO:0071973]		Salmonella typhimurium
A0FLJ5	A0FLJ5_SALTM	unreviewed	Flagellin	fliC	462	FUNCTION: Flagellin is the subunit protein which polymerizes to form the filaments of bacterial flagella. {ECO:0000256|RuleBase:RU362073}.	bacterial-type flagellum-dependent cell motility [GO:0071973]	structural molecule activity [GO:0005198]	bacterial-type flagellum filament [GO:0009420]; extracellular region [GO:0005576]	bacterial-type flagellum filament [GO:0009420]; extracellular region [GO:0005576]; structural molecule activity [GO:0005198]; bacterial-type flagellum-dependent cell motility [GO:0071973]		Salmonella typhimurium
A0FLJ6	A0FLJ6_SALTM	unreviewed	Flagellin	fliC	461	FUNCTION: Flagellin is the subunit protein which polymerizes to form the filaments of bacterial flagella. {ECO:0000256|RuleBase:RU362073}.	bacterial-type flagellum-dependent cell motility [GO:0071973]	structural molecule activity [GO:0005198]	bacterial-type flagellum filament [GO:0009420]; extracellular region [GO:0005576]	bacterial-type flagellum filament [GO:0009420]; extracellular region [GO:0005576]; structural molecule activity [GO:0005198]; bacterial-type flagellum-dependent cell motility [GO:0071973]		Salmonella typhimurium
A0FLJ7	A0FLJ7_SALTM	unreviewed	Flagellin	fliC	460	FUNCTION: Flagellin is the subunit protein which polymerizes to form the filaments of bacterial flagella. {ECO:0000256|RuleBase:RU362073}.	bacterial-type flagellum-dependent cell motility [GO:0071973]	structural molecule activity [GO:0005198]	bacterial-type flagellum filament [GO:0009420]; extracellular region [GO:0005576]	bacterial-type flagellum filament [GO:0009420]; extracellular region [GO:0005576]; structural molecule activity [GO:0005198]; bacterial-type flagellum-dependent cell motility [GO:0071973]		Salmonella typhimurium
A0FLJ8	A0FLJ8_SALTM	unreviewed	Flagellin	fliC	457	FUNCTION: Flagellin is the subunit protein which polymerizes to form the filaments of bacterial flagella. {ECO:0000256|RuleBase:RU362073}.	bacterial-type flagellum-dependent cell motility [GO:0071973]	structural molecule activity [GO:0005198]	bacterial-type flagellum filament [GO:0009420]; extracellular region [GO:0005576]	bacterial-type flagellum filament [GO:0009420]; extracellular region [GO:0005576]; structural molecule activity [GO:0005198]; bacterial-type flagellum-dependent cell motility [GO:0071973]		Salmonella typhimurium
A0FLJ9	A0FLJ9_SALTM	unreviewed	Flagellin	fliC	457	FUNCTION: Flagellin is the subunit protein which polymerizes to form the filaments of bacterial flagella. {ECO:0000256|RuleBase:RU362073}.	bacterial-type flagellum-dependent cell motility [GO:0071973]	structural molecule activity [GO:0005198]	bacterial-type flagellum filament [GO:0009420]; extracellular region [GO:0005576]	bacterial-type flagellum filament [GO:0009420]; extracellular region [GO:0005576]; structural molecule activity [GO:0005198]; bacterial-type flagellum-dependent cell motility [GO:0071973]		Salmonella typhimurium
A0FLK0	A0FLK0_SALTM	unreviewed	Flagellin	fliC	454	FUNCTION: Flagellin is the subunit protein which polymerizes to form the filaments of bacterial flagella. {ECO:0000256|RuleBase:RU362073}.	bacterial-type flagellum-dependent cell motility [GO:0071973]	structural molecule activity [GO:0005198]	bacterial-type flagellum filament [GO:0009420]; extracellular region [GO:0005576]	bacterial-type flagellum filament [GO:0009420]; extracellular region [GO:0005576]; structural molecule activity [GO:0005198]; bacterial-type flagellum-dependent cell motility [GO:0071973]		Salmonella typhimurium
A0FLK1	A0FLK1_SALTM	unreviewed	Flagellin	fliC	452	FUNCTION: Flagellin is the subunit protein which polymerizes to form the filaments of bacterial flagella. {ECO:0000256|RuleBase:RU362073}.	bacterial-type flagellum-dependent cell motility [GO:0071973]	structural molecule activity [GO:0005198]	bacterial-type flagellum filament [GO:0009420]; extracellular region [GO:0005576]	bacterial-type flagellum filament [GO:0009420]; extracellular region [GO:0005576]; structural molecule activity [GO:0005198]; bacterial-type flagellum-dependent cell motility [GO:0071973]		Salmonella typhimurium
A0FLK2	A0FLK2_SALTM	unreviewed	Flagellin	fliC	451	FUNCTION: Flagellin is the subunit protein which polymerizes to form the filaments of bacterial flagella. {ECO:0000256|RuleBase:RU362073}.	bacterial-type flagellum-dependent cell motility [GO:0071973]	structural molecule activity [GO:0005198]	bacterial-type flagellum filament [GO:0009420]; extracellular region [GO:0005576]	bacterial-type flagellum filament [GO:0009420]; extracellular region [GO:0005576]; structural molecule activity [GO:0005198]; bacterial-type flagellum-dependent cell motility [GO:0071973]		Salmonella typhimurium
A0FLK3	A0FLK3_SALTM	unreviewed	Flagellin	fliC	449	FUNCTION: Flagellin is the subunit protein which polymerizes to form the filaments of bacterial flagella. {ECO:0000256|RuleBase:RU362073}.	bacterial-type flagellum-dependent cell motility [GO:0071973]	structural molecule activity [GO:0005198]	bacterial-type flagellum filament [GO:0009420]; extracellular region [GO:0005576]	bacterial-type flagellum filament [GO:0009420]; extracellular region [GO:0005576]; structural molecule activity [GO:0005198]; bacterial-type flagellum-dependent cell motility [GO:0071973]		Salmonella typhimurium
A0FLK4	A0FLK4_SALTM	unreviewed	Flagellin	fliC	448	FUNCTION: Flagellin is the subunit protein which polymerizes to form the filaments of bacterial flagella. {ECO:0000256|RuleBase:RU362073}.	bacterial-type flagellum-dependent cell motility [GO:0071973]	structural molecule activity [GO:0005198]	bacterial-type flagellum filament [GO:0009420]; extracellular region [GO:0005576]	bacterial-type flagellum filament [GO:0009420]; extracellular region [GO:0005576]; structural molecule activity [GO:0005198]; bacterial-type flagellum-dependent cell motility [GO:0071973]		Salmonella typhimurium
A0FLK5	A0FLK5_SALTM	unreviewed	Flagellin	fliC	448	FUNCTION: Flagellin is the subunit protein which polymerizes to form the filaments of bacterial flagella. {ECO:0000256|RuleBase:RU362073}.	bacterial-type flagellum-dependent cell motility [GO:0071973]	structural molecule activity [GO:0005198]	bacterial-type flagellum filament [GO:0009420]; extracellular region [GO:0005576]	bacterial-type flagellum filament [GO:0009420]; extracellular region [GO:0005576]; structural molecule activity [GO:0005198]; bacterial-type flagellum-dependent cell motility [GO:0071973]		Salmonella typhimurium
A0FLK6	A0FLK6_SALTM	unreviewed	Flagellin	fliC	446	FUNCTION: Flagellin is the subunit protein which polymerizes to form the filaments of bacterial flagella. {ECO:0000256|RuleBase:RU362073}.	bacterial-type flagellum-dependent cell motility [GO:0071973]	structural molecule activity [GO:0005198]	bacterial-type flagellum filament [GO:0009420]; extracellular region [GO:0005576]	bacterial-type flagellum filament [GO:0009420]; extracellular region [GO:0005576]; structural molecule activity [GO:0005198]; bacterial-type flagellum-dependent cell motility [GO:0071973]		Salmonella typhimurium
A0FLK7	A0FLK7_SALTM	unreviewed	Flagellin	fliC	441	FUNCTION: Flagellin is the subunit protein which polymerizes to form the filaments of bacterial flagella. {ECO:0000256|RuleBase:RU362073}.	bacterial-type flagellum-dependent cell motility [GO:0071973]	structural molecule activity [GO:0005198]	bacterial-type flagellum filament [GO:0009420]; extracellular region [GO:0005576]	bacterial-type flagellum filament [GO:0009420]; extracellular region [GO:0005576]; structural molecule activity [GO:0005198]; bacterial-type flagellum-dependent cell motility [GO:0071973]		Salmonella typhimurium
A0FLK8	A0FLK8_SALTM	unreviewed	Flagellin	fliC	440	FUNCTION: Flagellin is the subunit protein which polymerizes to form the filaments of bacterial flagella. {ECO:0000256|RuleBase:RU362073}.	bacterial-type flagellum-dependent cell motility [GO:0071973]	structural molecule activity [GO:0005198]	bacterial-type flagellum filament [GO:0009420]; extracellular region [GO:0005576]	bacterial-type flagellum filament [GO:0009420]; extracellular region [GO:0005576]; structural molecule activity [GO:0005198]; bacterial-type flagellum-dependent cell motility [GO:0071973]		Salmonella typhimurium
A0FLK9	A0FLK9_SALTM	unreviewed	Flagellin	fliC	433	FUNCTION: Flagellin is the subunit protein which polymerizes to form the filaments of bacterial flagella. {ECO:0000256|RuleBase:RU362073}.	bacterial-type flagellum-dependent cell motility [GO:0071973]	structural molecule activity [GO:0005198]	bacterial-type flagellum filament [GO:0009420]; extracellular region [GO:0005576]	bacterial-type flagellum filament [GO:0009420]; extracellular region [GO:0005576]; structural molecule activity [GO:0005198]; bacterial-type flagellum-dependent cell motility [GO:0071973]		Salmonella typhimurium
A0FLL0	A0FLL0_SALTM	unreviewed	Flagellin	fliC	426	FUNCTION: Flagellin is the subunit protein which polymerizes to form the filaments of bacterial flagella. {ECO:0000256|RuleBase:RU362073}.	bacterial-type flagellum-dependent cell motility [GO:0071973]	structural molecule activity [GO:0005198]	bacterial-type flagellum filament [GO:0009420]; extracellular region [GO:0005576]	bacterial-type flagellum filament [GO:0009420]; extracellular region [GO:0005576]; structural molecule activity [GO:0005198]; bacterial-type flagellum-dependent cell motility [GO:0071973]		Salmonella typhimurium
A0FLL1	A0FLL1_SALTM	unreviewed	Flagellin	fliC	420	FUNCTION: Flagellin is the subunit protein which polymerizes to form the filaments of bacterial flagella. {ECO:0000256|RuleBase:RU362073}.	bacterial-type flagellum-dependent cell motility [GO:0071973]	structural molecule activity [GO:0005198]	bacterial-type flagellum filament [GO:0009420]; extracellular region [GO:0005576]	bacterial-type flagellum filament [GO:0009420]; extracellular region [GO:0005576]; structural molecule activity [GO:0005198]; bacterial-type flagellum-dependent cell motility [GO:0071973]		Salmonella typhimurium
A0FLL2	A0FLL2_SALTM	unreviewed	Flagellin	fliC	386	FUNCTION: Flagellin is the subunit protein which polymerizes to form the filaments of bacterial flagella. {ECO:0000256|RuleBase:RU362073}.	bacterial-type flagellum-dependent cell motility [GO:0071973]	structural molecule activity [GO:0005198]	bacterial-type flagellum filament [GO:0009420]; extracellular region [GO:0005576]	bacterial-type flagellum filament [GO:0009420]; extracellular region [GO:0005576]; structural molecule activity [GO:0005198]; bacterial-type flagellum-dependent cell motility [GO:0071973]		Salmonella typhimurium
A0FLL3	A0FLL3_SALTM	unreviewed	Flagellin	fliC	327	FUNCTION: Flagellin is the subunit protein which polymerizes to form the filaments of bacterial flagella. {ECO:0000256|RuleBase:RU362073}.	bacterial-type flagellum-dependent cell motility [GO:0071973]	structural molecule activity [GO:0005198]	bacterial-type flagellum filament [GO:0009420]; extracellular region [GO:0005576]	bacterial-type flagellum filament [GO:0009420]; extracellular region [GO:0005576]; structural molecule activity [GO:0005198]; bacterial-type flagellum-dependent cell motility [GO:0071973]		Salmonella typhimurium
A0FLL4	A0FLL4_SALTM	unreviewed	Flagellin	fliC	318	FUNCTION: Flagellin is the subunit protein which polymerizes to form the filaments of bacterial flagella. {ECO:0000256|RuleBase:RU362073}.	bacterial-type flagellum-dependent cell motility [GO:0071973]	structural molecule activity [GO:0005198]	bacterial-type flagellum filament [GO:0009420]; extracellular region [GO:0005576]	bacterial-type flagellum filament [GO:0009420]; extracellular region [GO:0005576]; structural molecule activity [GO:0005198]; bacterial-type flagellum-dependent cell motility [GO:0071973]		Salmonella typhimurium
E7CZH2	E7CZH2_SALTM	unreviewed	Flagellin (Fragment)	fliC	495	FUNCTION: Flagellin is the subunit protein which polymerizes to form the filaments of bacterial flagella. {ECO:0000256|RuleBase:RU362073}.	bacterial-type flagellum-dependent cell motility [GO:0071973]	structural molecule activity [GO:0005198]	bacterial-type flagellum filament [GO:0009420]; extracellular region [GO:0005576]	bacterial-type flagellum filament [GO:0009420]; extracellular region [GO:0005576]; structural molecule activity [GO:0005198]; bacterial-type flagellum-dependent cell motility [GO:0071973]		Salmonella typhimurium
G3M0D1	G3M0D1_SALTM	unreviewed	Flagellin	fliC	505	FUNCTION: Flagellin is the subunit protein which polymerizes to form the filaments of bacterial flagella. {ECO:0000256|RuleBase:RU362073}.	bacterial-type flagellum-dependent cell motility [GO:0071973]	structural molecule activity [GO:0005198]	bacterial-type flagellum filament [GO:0009420]; extracellular region [GO:0005576]	bacterial-type flagellum filament [GO:0009420]; extracellular region [GO:0005576]; structural molecule activity [GO:0005198]; bacterial-type flagellum-dependent cell motility [GO:0071973]		Salmonella typhimurium
M1UFC8	M1UFC8_SALTM	unreviewed	FliC (Fragment)	fliC	145							Salmonella typhimurium
Q103P8	Q103P8_SALTM	unreviewed	Flagellin (Fragment)	fliC	427	FUNCTION: Flagellin is the subunit protein which polymerizes to form the filaments of bacterial flagella. {ECO:0000256|RuleBase:RU362073}.	bacterial-type flagellum-dependent cell motility [GO:0071973]	structural molecule activity [GO:0005198]	bacterial-type flagellum filament [GO:0009420]; extracellular region [GO:0005576]	bacterial-type flagellum filament [GO:0009420]; extracellular region [GO:0005576]; structural molecule activity [GO:0005198]; bacterial-type flagellum-dependent cell motility [GO:0071973]		Salmonella typhimurium
Q103Q0	Q103Q0_SALTM	unreviewed	Flagellin (Fragment)	fliC	427	FUNCTION: Flagellin is the subunit protein which polymerizes to form the filaments of bacterial flagella. {ECO:0000256|RuleBase:RU362073}.	bacterial-type flagellum-dependent cell motility [GO:0071973]	structural molecule activity [GO:0005198]	bacterial-type flagellum filament [GO:0009420]; extracellular region [GO:0005576]	bacterial-type flagellum filament [GO:0009420]; extracellular region [GO:0005576]; structural molecule activity [GO:0005198]; bacterial-type flagellum-dependent cell motility [GO:0071973]		Salmonella typhimurium
Q66PQ5	Q66PQ5_SALTM	unreviewed	Flagellin	fliC	495	FUNCTION: Flagellin is the subunit protein which polymerizes to form the filaments of bacterial flagella. {ECO:0000256|RuleBase:RU362073}.	bacterial-type flagellum-dependent cell motility [GO:0071973]	structural molecule activity [GO:0005198]	bacterial-type flagellum filament [GO:0009420]; extracellular region [GO:0005576]	bacterial-type flagellum filament [GO:0009420]; extracellular region [GO:0005576]; structural molecule activity [GO:0005198]; bacterial-type flagellum-dependent cell motility [GO:0071973]		Salmonella typhimurium
Q66PQ6	Q66PQ6_SALTM	unreviewed	Flagellin	fliC	495	FUNCTION: Flagellin is the subunit protein which polymerizes to form the filaments of bacterial flagella. {ECO:0000256|RuleBase:RU362073}.	bacterial-type flagellum-dependent cell motility [GO:0071973]	structural molecule activity [GO:0005198]	bacterial-type flagellum filament [GO:0009420]; extracellular region [GO:0005576]	bacterial-type flagellum filament [GO:0009420]; extracellular region [GO:0005576]; structural molecule activity [GO:0005198]; bacterial-type flagellum-dependent cell motility [GO:0071973]		Salmonella typhimurium
Q6JKG7	Q6JKG7_SALTM	unreviewed	FliC (Fragment)	fliC	200							Salmonella typhimurium
V9ZAX0	V9ZAX0_SALTM	unreviewed	Flagellin (Fragment)	fliC	100							Salmonella typhimurium
A0A0J5GIN4	A0A0J5GIN4_SALTM	unreviewed	Chaperone protein DnaJ	dnaJ DD95_14795	379	FUNCTION: Participates actively in the response to hyperosmotic and heat shock by preventing the aggregation of stress-denatured proteins and by disaggregating proteins, also in an autonomous, DnaK-independent fashion. Unfolded proteins bind initially to DnaJ; upon interaction with the DnaJ-bound protein, DnaK hydrolyzes its bound ATP, resulting in the formation of a stable complex. GrpE releases…	DNA replication [GO:0006260]; protein folding [GO:0006457]; response to heat [GO:0009408]	ATP binding [GO:0005524]; heat shock protein binding [GO:0031072]; unfolded protein binding [GO:0051082]; zinc ion binding [GO:0008270]	cytoplasm [GO:0005737]	cytoplasm [GO:0005737]; ATP binding [GO:0005524]; heat shock protein binding [GO:0031072]; unfolded protein binding [GO:0051082]; zinc ion binding [GO:0008270]; DNA replication [GO:0006260]; protein folding [GO:0006457]; response to heat [GO:0009408]		Salmonella typhimurium
P37593	NARU_SALTY	reviewed	Nitrate/nitrite transporter NarU (Nitrite extrusion protein 2) (Nitrite facilitator 2)	narU STM1576	462	FUNCTION: Catalyzes nitrate uptake, nitrite uptake and nitrite export across the cytoplasmic membrane. {ECO:0000250}.	nitrate assimilation [GO:0042128]; nitrite transport [GO:0015707]	nitrate transmembrane transporter activity [GO:0015112]; nitrite efflux transmembrane transporter activity [GO:0015514]	integral component of plasma membrane [GO:0005887]	integral component of plasma membrane [GO:0005887]; nitrate transmembrane transporter activity [GO:0015112]; nitrite efflux transmembrane transporter activity [GO:0015514]; nitrate assimilation [GO:0042128]; nitrite transport [GO:0015707]		Salmonella typhimurium (strain LT2 / SGSC1412 / ATCC 700720)
O32102	BESA_BACSU	reviewed	Ferri-bacillibactin esterase BesA (EC 3.1.-.-) (Bacillibactin trilactone hydrolase)	besA yuiI BSU32010	289	FUNCTION: Catalyzes the hydrolysis of the trilactone cycle of ferri-bacillibactin (ferri-BB) complex, leading to the formation of bacillibactin monomers and to cytosolic iron release, thus making iron available for metabolic use. Can also hydrolyze bacillibactin (BB), however the catalytic efficiency for ferri-BB hydrolysis is much higher than for BB. {ECO:0000269|PubMed:16889643}.		carboxylic ester hydrolase activity [GO:0052689]	cytoplasm [GO:0005737]	cytoplasm [GO:0005737]; carboxylic ester hydrolase activity [GO:0052689]		Bacillus subtilis (strain 168)
P0ABL9	CCMB_ECOL6	reviewed	Heme exporter protein B (Cytochrome c-type biogenesis protein CcmB)	ccmB c2737	220	FUNCTION: Required for the export of heme to the periplasm for the biogenesis of c-type cytochromes. {ECO:0000250}.	cytochrome complex assembly [GO:0017004]	heme transporter activity [GO:0015232]	integral component of membrane [GO:0016021]; plasma membrane [GO:0005886]	integral component of membrane [GO:0016021]; plasma membrane [GO:0005886]; heme transporter activity [GO:0015232]; cytochrome complex assembly [GO:0017004]		Escherichia coli O6:H1 (strain CFT073 / ATCC 700928 / UPEC)
P0ABM1	CCMC_ECOLI	reviewed	Heme exporter protein C (Cytochrome c-type biogenesis protein CcmC)	ccmC yejT yejU b2199 JW2187	245	FUNCTION: Required for the export of heme to the periplasm for the biogenesis of c-type cytochromes.	cytochrome complex assembly [GO:0017004]; oxidation-reduction process [GO:0055114]	heme binding [GO:0020037]; heme transporter activity [GO:0015232]	integral component of plasma membrane [GO:0005887]; plasma membrane [GO:0005886]	integral component of plasma membrane [GO:0005887]; plasma membrane [GO:0005886]; heme binding [GO:0020037]; heme transporter activity [GO:0015232]; cytochrome complex assembly [GO:0017004]; oxidation-reduction process [GO:0055114]		Escherichia coli (strain K12)
P0ABM5	CCMD_ECOLI	reviewed	Heme exporter protein D (Cytochrome c-type biogenesis protein CcmD)	ccmD yojM b2198 JW2186	69	FUNCTION: Required for the export of heme to the periplasm for the biogenesis of c-type cytochromes. {ECO:0000305}.	cytochrome complex assembly [GO:0017004]; heme transport [GO:0015886]		integral component of membrane [GO:0016021]; intrinsic component of the cytoplasmic side of the plasma membrane [GO:0031235]	integral component of membrane [GO:0016021]; intrinsic component of the cytoplasmic side of the plasma membrane [GO:0031235]; cytochrome complex assembly [GO:0017004]; heme transport [GO:0015886]		Escherichia coli (strain K12)
Q81CH1	CLPP1_BACCR	reviewed	ATP-dependent Clp protease proteolytic subunit 1 (EC 3.4.21.92) (Endopeptidase Clp 1)	clpP1 BC_2793	193	FUNCTION: Cleaves peptides in various proteins in a process that requires ATP hydrolysis. Has a chymotrypsin-like activity. Plays a major role in the degradation of misfolded proteins. {ECO:0000255|HAMAP-Rule:MF_00444}.		serine-type endopeptidase activity [GO:0004252]	cytoplasm [GO:0005737]	cytoplasm [GO:0005737]; serine-type endopeptidase activity [GO:0004252]		Bacillus cereus (strain ATCC 14579 / DSM 31 / JCM 2152 / NBRC 15305 / NCIMB 9373 / NRRL B-3711)
P0AEF0	DNAC_ECOLI	reviewed	DNA replication protein DnaC	dnaC dnaD b4361 JW4325	245	FUNCTION: This protein is required for chromosomal replication. It forms, in concert with DnaB protein and other prepriming proteins DnaT, N, N', N'' a prepriming protein complex on the specific site of the template DNA recognized by protein N'.	DNA replication, synthesis of RNA primer [GO:0006269]; DNA strand elongation involved in DNA replication [GO:0006271]	ATP binding [GO:0005524]	cytoplasm [GO:0005737]; primosome complex [GO:1990077]	cytoplasm [GO:0005737]; primosome complex [GO:1990077]; ATP binding [GO:0005524]; DNA replication, synthesis of RNA primer [GO:0006269]; DNA strand elongation involved in DNA replication [GO:0006271]		Escherichia coli (strain K12)
P0AA86	DSBE_ECOLI	reviewed	Thiol:disulfide interchange protein DsbE (Cytochrome c biogenesis protein CcmG)	dsbE ccmG yejQ b2195 JW2183	185	FUNCTION: Involved in disulfide bond formation. Catalyzes a late, reductive step in the assembly of periplasmic c-type cytochromes, probably the reduction of disulfide bonds of the apocytochrome c to allow covalent linkage with the heme. Possible subunit of a heme lyase. DsbE is maintained in a reduced state by DsbD.	cell redox homeostasis [GO:0045454]; cytochrome complex assembly [GO:0017004]; oxidation-reduction process [GO:0055114]	disulfide oxidoreductase activity [GO:0015036]	integral component of membrane [GO:0016021]; intrinsic component of periplasmic side of plasma membrane [GO:0031237]; outer membrane-bounded periplasmic space [GO:0030288]	integral component of membrane [GO:0016021]; intrinsic component of periplasmic side of plasma membrane [GO:0031237]; outer membrane-bounded periplasmic space [GO:0030288]; disulfide oxidoreductase activity [GO:0015036]; cell redox homeostasis [GO:0045454]; cytochrome complex assembly [GO:0017004]; oxidation-reduction process [GO:0055114]		Escherichia coli (strain K12)
A0A100PUR4	A0A100PUR4_SALCE	unreviewed	Desosaminyl transferase EryCIII	eryCIII NGUA18_03990	371			transferase activity [GO:0016740]		transferase activity [GO:0016740]		Salmonella choleraesuis
P13039	FES_ECOLI	reviewed	Enterochelin esterase (Ferric enterobactin esterase)	fes b0585 JW0576	400	FUNCTION: Upon internalization, ferric enterobactin is processed via an exquisitely specific pathway that is dependent on FES activity, making iron available for metabolic use.	enterobactin catabolic process [GO:0046214]; iron ion homeostasis [GO:0055072]; iron ion transport [GO:0006826]	enterochelin esterase activity [GO:0008849]; iron ion binding [GO:0005506]	cytoplasm [GO:0005737]	cytoplasm [GO:0005737]; enterochelin esterase activity [GO:0008849]; iron ion binding [GO:0005506]; enterobactin catabolic process [GO:0046214]; iron ion homeostasis [GO:0055072]; iron ion transport [GO:0006826]		Escherichia coli (strain K12)
P42405	HPS_BACSU	reviewed	3-hexulose-6-phosphate synthase (HPS) (EC 4.1.2.43) (D-arabino-3-hexulose-6-phosphate formaldehyde lyase) (HUMPS)	hxlA yckG BSU03460	210	FUNCTION: Catalyzes the condensation of ribulose 5-phosphate with formaldehyde to form 3-hexulose 6-phosphate. Together with HxlB, may act as a formaldehyde detoxification system.	'de novo' pyrimidine nucleobase biosynthetic process [GO:0006207]; carbohydrate metabolic process [GO:0005975]; formaldehyde assimilation via ribulose monophosphate cycle [GO:0019647]; one-carbon metabolic process [GO:0006730]; response to toxic substance [GO:0009636]	hexulose-6-phosphate synthase activity [GO:0043801]; orotidine-5'-phosphate decarboxylase activity [GO:0004590]	cytosol [GO:0005829]	cytosol [GO:0005829]; hexulose-6-phosphate synthase activity [GO:0043801]; orotidine-5'-phosphate decarboxylase activity [GO:0004590]; 'de novo' pyrimidine nucleobase biosynthetic process [GO:0006207]; carbohydrate metabolic process [GO:0005975]; formaldehyde assimilation via ribulose monophosphate cycle [GO:0019647]; one-carbon metabolic process [GO:0006730]; response to toxic substance [GO:0009…		Bacillus subtilis (strain 168)
P42404	PHI_BACSU	reviewed	3-hexulose-6-phosphate isomerase (EC 5.3.1.27) (6-phospho-3-hexuloisomerase) (PHI)	hxlB yckF BSU03450	185	FUNCTION: Catalyzes the isomerization between 3-hexulose 6-phosphate and fructose 6-phosphate. Together with HxlA, may act as a formaldehyde detoxification system.	carbohydrate derivative metabolic process [GO:1901135]; carbohydrate metabolic process [GO:0005975]; formaldehyde assimilation via ribulose monophosphate cycle [GO:0019647]; response to toxic substance [GO:0009636]	carbohydrate derivative binding [GO:0097367]; isomerase activity [GO:0016853]		carbohydrate derivative binding [GO:0097367]; isomerase activity [GO:0016853]; carbohydrate derivative metabolic process [GO:1901135]; carbohydrate metabolic process [GO:0005975]; formaldehyde assimilation via ribulose monophosphate cycle [GO:0019647]; response to toxic substance [GO:0009636]		Bacillus subtilis (strain 168)
Q05098	PFEA_PSEAE	reviewed	Ferric enterobactin receptor	pfeA PA2688	746	FUNCTION: Specific receptor for the siderophore ferric enterobactin.	enterobactin transport [GO:0042930]; iron ion homeostasis [GO:0055072]; siderophore transport [GO:0015891]	enterobactin transporter activity [GO:0042931]; iron ion binding [GO:0005506]; receptor activity [GO:0004872]; siderophore uptake transmembrane transporter activity [GO:0015344]	cell outer membrane [GO:0009279]; integral component of membrane [GO:0016021]; outer membrane [GO:0019867]	cell outer membrane [GO:0009279]; integral component of membrane [GO:0016021]; outer membrane [GO:0019867]; enterobactin transporter activity [GO:0042931]; iron ion binding [GO:0005506]; receptor activity [GO:0004872]; siderophore uptake transmembrane transporter activity [GO:0015344]; enterobactin transport [GO:0042930]; iron ion homeostasis [GO:0055072]; siderophore transport [GO:0015891]		Pseudomonas aeruginosa (strain ATCC 15692 / DSM 22644 / CIP 104116 / JCM 14847 / LMG 12228 / 1C / PRS 101 / PAO1)
Q8ZMM8	PIPB2_SALTY	reviewed	Secreted effector protein PipB2 (Type III effector PipB2)	pipB2 STM2780	350	FUNCTION: Effector proteins function to alter host cell physiology and promote bacterial survival in host tissues. Involved in the reorganization of late endosome/lysosome (LE/Lys) compartments in mammalian cells. Necessary and sufficient to link kinesin-1 onto the Salmonella-containing vacuole (SCV) membrane. Required for centrifugal extension of lysosomal glycoprotein-rich membrane tubules, kno…	pathogenesis [GO:0009405]		extracellular region [GO:0005576]; host cell membrane [GO:0033644]; membrane [GO:0016020]	extracellular region [GO:0005576]; host cell membrane [GO:0033644]; membrane [GO:0016020]; pathogenesis [GO:0009405]		Salmonella typhimurium (strain LT2 / SGSC1412 / ATCC 700720)
P37439	PTGCB_SALTY	reviewed	PTS system glucose-specific EIICB component (EIICB-Glc) (EII-Glc) [Includes: Glucose permease IIC component (PTS system glucose-specific EIIC component); Glucose-specific phosphotransferase enzyme IIB component (EC 2.7.1.199) (PTS system glucose-specific EIIB component)]	ptsG STM1203	477	FUNCTION: The phosphoenolpyruvate-dependent sugar phosphotransferase system (sugar PTS), a major carbohydrate active transport system, catalyzes the phosphorylation of incoming sugar substrates concomitantly with their translocation across the cell membrane. The enzyme II complex composed of PtsG and Crr is involved in glucose transport. Also functions as a chemoreceptor monitoring the environmen…	phosphoenolpyruvate-dependent sugar phosphotransferase system [GO:0009401]	glucose transmembrane transporter activity [GO:0005355]; kinase activity [GO:0016301]; protein-N(PI)-phosphohistidine-sugar phosphotransferase activity [GO:0008982]	integral component of membrane [GO:0016021]; plasma membrane [GO:0005886]	integral component of membrane [GO:0016021]; plasma membrane [GO:0005886]; glucose transmembrane transporter activity [GO:0005355]; kinase activity [GO:0016301]; protein-N(PI)-phosphohistidine-sugar phosphotransferase activity [GO:0008982]; phosphoenolpyruvate-dependent sugar phosphotransferase system [GO:0009401]		Salmonella typhimurium (strain LT2 / SGSC1412 / ATCC 700720)
P26401	RFBV_SALTY	reviewed	Abequosyltransferase RfbV (EC 2.4.1.60) (O antigen biosynthesis abequosyltransferase RfbV)	rfbV ORF 14.1 STM2087	333	FUNCTION: Catalyzes the transfer of CDP-abequose on D-mannosyl-L-rhamnosyl-D-galactose-1-diphospholipid to yield D-abequosyl-D-mannosyl-rhamnosyl-D-galactose-1-diphospholipid. {ECO:0000269|PubMed:7541787}.	O antigen biosynthetic process [GO:0009243]	abequosyltransferase activity [GO:0047600]		abequosyltransferase activity [GO:0047600]; O antigen biosynthetic process [GO:0009243]		Salmonella typhimurium (strain LT2 / SGSC1412 / ATCC 700720)

## Sheet: cluster1
Entry	Entry name	Status	Protein names	Gene names	Length	Function [CC]	Gene ontology	Gene ontology	Gene ontology	Gene ontology (GO)	yourlist:M2017062883C3DD8CE55183C76102DC5D3A26728BD57B3E7	Organism
Q2FV54	OATA_STAA8	reviewed	O-acetyltransferase OatA (EC 2.3.1.-)	oatA SAOUHSC_02885	603	FUNCTION: Responsible for O-acetylation at the C(6)-hydroxyl group of N-acetylmuramyl residues, forming the corresponding N,6-O-diacetylmuramic acid of the peptidoglycan. O-acetylation of the peptidoglycan is the major determinant for lysozyme resistance. {ECO:0000269|PubMed:15661003}.	integral component of membrane [GO:0016021]; membrane [GO:0016020]; plasma membrane [GO:0005886]; transferase activity, transferring acyl groups other than amino-acyl groups [GO:0016747]; lipopolysaccharide biosynthetic process [GO:0009103]	integral component of membrane [GO:0016021]; membrane [GO:0016020]; plasma membrane [GO:0005886]; transferase activity, transferring acyl groups other than amino-acyl groups [GO:0016747]; lipopolysaccharide biosynthetic process [GO:0009103]	integral component of membrane [GO:0016021]; membrane [GO:0016020]; plasma membrane [GO:0005886]; transferase activity, transferring acyl groups other than amino-acyl groups [GO:0016747]; lipopolysaccharide biosynthetic process [GO:0009103]	integral component of membrane [GO:0016021]; membrane [GO:0016020]; plasma membrane [GO:0005886]; transferase activity, transferring acyl groups other than amino-acyl groups [GO:0016747]; lipopolysaccharide biosynthetic process [GO:0009103]		Staphylococcus aureus (strain NCTC 8325)

## Sheet: cluster2
Entry	Entry name	Status	Protein names	Gene names	Length	Function [CC]	Gene ontology (biological process)	Gene ontology (molecular function)	Gene ontology (cellular component)	Gene ontology (GO)	yourlist:M2017062883C3DD8CE55183C76102DC5D3A26728BD57B3E7	Organism
A0A0D6I469	A0A0D6I469_SALTM	unreviewed	Sodium/glutamate symporter	gltS DD95_07195	401	FUNCTION: Catalyzes the sodium-dependent transport of glutamate. {ECO:0000256|HAMAP-Rule:MF_02062}.		glutamate:sodium symporter activity [GO:0015501]	integral component of membrane [GO:0016021]; plasma membrane [GO:0005886]	integral component of membrane [GO:0016021]; plasma membrane [GO:0005886]; glutamate:sodium symporter activity [GO:0015501]		Salmonella typhimurium
P67732	CMTR_MYCBO	reviewed	HTH-type transcriptional regulator CmtR	cmtR BQ2027_MB2017C	118	FUNCTION: Metal-responsive transcriptional repressor for the cmt operon. Binding of cadmium or lead causes the repressor to dissociate from the DNA (By similarity). {ECO:0000250}.	DNA binding [GO:0003677]; metal ion binding [GO:0046872]; transcription factor activity, sequence-specific DNA binding [GO:0003700]; transcription, DNA-templated [GO:0006351]	DNA binding [GO:0003677]; metal ion binding [GO:0046872]; transcription factor activity, sequence-specific DNA binding [GO:0003700]; transcription, DNA-templated [GO:0006351]	DNA binding [GO:0003677]; metal ion binding [GO:0046872]; transcription factor activity, sequence-specific DNA binding [GO:0003700]; transcription, DNA-templated [GO:0006351]	DNA binding [GO:0003677]; metal ion binding [GO:0046872]; transcription factor activity, sequence-specific DNA binding [GO:0003700]; transcription, DNA-templated [GO:0006351]		Mycobacterium bovis (strain ATCC BAA-935 / AF2122/97)

## Sheet: cluster3
Entry	Entry name	Status	Protein names	Gene names	Length	Function [CC]	Gene ontology (biological process)	Gene ontology (molecular function)	Gene ontology (cellular component)	Gene ontology (GO)	yourlist:M2017062883C3DD8CE55183C76102DC5D3A26728BD57B3E7	Organism
F2Z7Z3	F2Z7Z3_SALTM	unreviewed	DNA topoisomerase III	topB TopB DD95_07975	730		DNA topological change [GO:0006265]	DNA binding [GO:0003677]; DNA topoisomerase type I activity [GO:0003917]	chromosome [GO:0005694]	chromosome [GO:0005694]; DNA binding [GO:0003677]; DNA topoisomerase type I activity [GO:0003917]; DNA topological change [GO:0006265]		Salmonella typhimurium
Q5QJF5	Q5QJF5_SALTM	unreviewed	Single-stranded DNA-binding protein (SSB)	ssb	175	FUNCTION: Plays an important role in DNA replication, recombination and repair. Binds to ssDNA and to an array of partner proteins to recruit them to their sites of action during DNA metabolism. {ECO:0000256|HAMAP-Rule:MF_00984}.	DNA recombination [GO:0006310]; DNA repair [GO:0006281]; DNA replication [GO:0006260]	single-stranded DNA binding [GO:0003697]		single-stranded DNA binding [GO:0003697]; DNA recombination [GO:0006310]; DNA repair [GO:0006281]; DNA replication [GO:0006260]		Salmonella typhimurium
Q79SA7	Q79SA7_SALTM	unreviewed	Repressor protein	arsD	120		negative regulation of transcription, DNA-templated [GO:0045892]; response to arsenic-containing substance [GO:0046685]	DNA binding [GO:0003677]		DNA binding [GO:0003677]; negative regulation of transcription, DNA-templated [GO:0045892]; response to arsenic-containing substance [GO:0046685]		Salmonella typhimurium
Q79SA6	Q79SA6_SALTM	unreviewed	Arsenite acitvated ATPase	arsA	583		detoxification of arsenic-containing substance [GO:0071722]	ATPase-coupled arsenite transmembrane transporter activity [GO:0015446]; ATP binding [GO:0005524]		ATP binding [GO:0005524]; ATPase-coupled arsenite transmembrane transporter activity [GO:0015446]; detoxification of arsenic-containing substance [GO:0071722]		Salmonella typhimurium
A0A077W499	A0A077W499_SALTM	unreviewed	Arsenical pump membrane protein	arsB arsB_1	429	FUNCTION: Involved in arsenical resistance. Thought to form the channel of an arsenite pump. {ECO:0000256|RuleBase:RU004993}.	arsenite transport [GO:0015700]; response to arsenic-containing substance [GO:0046685]	arsenite transmembrane transporter activity [GO:0015105]	integral component of membrane [GO:0016021]; plasma membrane [GO:0005886]	integral component of membrane [GO:0016021]; plasma membrane [GO:0005886]; arsenite transmembrane transporter activity [GO:0015105]; arsenite transport [GO:0015700]; response to arsenic-containing substance [GO:0046685]		Salmonella typhimurium
A0A077W6E0	A0A077W6E0_SALTM	unreviewed	Arsenate reductase (EC 1.20.4.1)	arsC arsC_1	141			arsenate reductase (glutaredoxin) activity [GO:0008794]		arsenate reductase (glutaredoxin) activity [GO:0008794]		Salmonella typhimurium
A0A0D6IN46	A0A0D6IN46_SALTM	unreviewed	Tyrosine recombinase XerC	xerC DD95_04925	300		cell cycle [GO:0007049]; cell division [GO:0051301]; chromosome segregation [GO:0007059]; transposition, DNA-mediated [GO:0006313]	DNA binding [GO:0003677]; tyrosine-based site-specific recombinase activity [GO:0009037]	cytoplasm [GO:0005737]	cytoplasm [GO:0005737]; DNA binding [GO:0003677]; tyrosine-based site-specific recombinase activity [GO:0009037]; cell cycle [GO:0007049]; cell division [GO:0051301]; chromosome segregation [GO:0007059]; transposition, DNA-mediated [GO:0006313]		Salmonella typhimurium
A0A077W3K6	A0A077W3K6_SALTM	unreviewed	Conjugal transfer ATP-binding protein (Conjugal transfer protein) (Plasmid conjugative transfer pilus assembly protein TraC) (TrhC)	traC trhC	893			ATP binding [GO:0005524]		ATP binding [GO:0005524]		Salmonella typhimurium
A0A077W6B7	A0A077W6B7_SALTM	unreviewed	Copper resistant sensor kinase (EC 2.7.13.3) (Sensor kinase CusS)	cusS	388			ATP binding [GO:0005524]; phosphorelay sensor kinase activity [GO:0000155]	integral component of membrane [GO:0016021]; intracellular [GO:0005622]	integral component of membrane [GO:0016021]; intracellular [GO:0005622]; ATP binding [GO:0005524]; phosphorelay sensor kinase activity [GO:0000155]		Salmonella typhimurium
Q9Z4N3	SILE_SALTM	reviewed	Silver-binding protein SilE	silE	143	FUNCTION: Component of the sil cation-efflux system that confers resistance to silver.		metal ion binding [GO:0046872]	periplasmic space [GO:0042597]	periplasmic space [GO:0042597]; metal ion binding [GO:0046872]		Salmonella typhimurium
A0A0D6H8Q7	A0A0D6H8Q7_SALTM	unreviewed	Copper-transporting ATPase	copA DD95_23125	833		metal ion transport [GO:0030001]	cation-transporting ATPase activity [GO:0019829]; metal ion binding [GO:0046872]; nucleotide binding [GO:0000166]	integral component of membrane [GO:0016021]; plasma membrane [GO:0005886]	integral component of membrane [GO:0016021]; plasma membrane [GO:0005886]; cation-transporting ATPase activity [GO:0019829]; metal ion binding [GO:0046872]; nucleotide binding [GO:0000166]; metal ion transport [GO:0030001]		Salmonella typhimurium
A0A0C5PMZ6	A0A0C5PMZ6_SALTM	unreviewed	Transcriptional regulator (Transcriptional regulatory protein)	copR DD95_21595	226		phosphorelay signal transduction system [GO:0000160]; regulation of transcription, DNA-templated [GO:0006355]	DNA binding [GO:0003677]	intracellular [GO:0005622]	intracellular [GO:0005622]; DNA binding [GO:0003677]; phosphorelay signal transduction system [GO:0000160]; regulation of transcription, DNA-templated [GO:0006355]		Salmonella typhimurium
A0A077W475	A0A077W475_SALTM	unreviewed	Copper-binding protein (PcoE1) (Probable copper-binding protein pcoE)	pcoE	144							Salmonella typhimurium
Q9ZHC7	SILP_SALTM	reviewed	Silver exporting P-type ATPase (EC 3.6.3.53)	silP	824	FUNCTION: Component of the sil cation-efflux system that confers resistance to silver.		ATP binding [GO:0005524]; metal ion binding [GO:0046872]; silver-exporting ATPase activity [GO:0015445]	integral component of membrane [GO:0016021]; plasma membrane [GO:0005886]	integral component of membrane [GO:0016021]; plasma membrane [GO:0005886]; ATP binding [GO:0005524]; metal ion binding [GO:0046872]; silver-exporting ATPase activity [GO:0015445]		Salmonella typhimurium
O52623	SOPE_SALTM	reviewed	Guanine nucleotide exchange factor SopE (Effector protein SopE) (Toxin SopE)	sopE	240	FUNCTION: Activator for both CDC42 and RAC1 by directly engaging these Rho GTPases and acting as potent guanine nucleotide exchange factor (GEF). This activation results in actin cytoskeleton rearrangements and stimulates membrane ruffling, promoting bacterial entry into non-phagocytic cells. Also activates MAPK8, indicating that it is capable of stimulating signaling pathways that can lead to nu…	actin cytoskeleton reorganization [GO:0031532]; activation of GTPase activity [GO:0090630]; pathogenesis [GO:0009405]	GTPase activator activity [GO:0005096]; guanyl-nucleotide exchange factor activity [GO:0005085]	extracellular region [GO:0005576]	extracellular region [GO:0005576]; GTPase activator activity [GO:0005096]; guanyl-nucleotide exchange factor activity [GO:0005085]; actin cytoskeleton reorganization [GO:0031532]; activation of GTPase activity [GO:0090630]; pathogenesis [GO:0009405]		Salmonella typhimurium
P96677	ASER_BACSU	reviewed	HTH-type transcriptional repressor AseR	aseR ydeT BSU05330	111	FUNCTION: Metal-responsive transcriptional regulator that represses transcription of the aseR-ydfA operon by binding specifically to its promoter. Binding of arsenite or antimonite causes the repressor to dissociate from the DNA. {ECO:0000269|PubMed:16430705}.	regulation of transcription, DNA-templated [GO:0006355]; transcription, DNA-templated [GO:0006351]	metal ion binding [GO:0046872]; transcription factor activity, sequence-specific DNA binding [GO:0003700]; transcription regulatory region DNA binding [GO:0044212]	cytoplasm [GO:0005737]	cytoplasm [GO:0005737]; metal ion binding [GO:0046872]; transcription factor activity, sequence-specific DNA binding [GO:0003700]; transcription regulatory region DNA binding [GO:0044212]; regulation of transcription, DNA-templated [GO:0006355]; transcription, DNA-templated [GO:0006351]		Bacillus subtilis (strain 168)
P16426	PAT_STRHY	reviewed	Phosphinothricin N-acetyltransferase (PPT N-acetyltransferase) (EC 2.3.1.183) (Phosphinothricin-resistance protein)	bar	183	FUNCTION: Inactivates phosphinothricin (PPT) by transfer of an acetyl group from acetyl CoA. Can also acetylate demethylphosphinothricin but not PTT or glutamate. This enzyme is an effector of phosphinothricin tripeptide (PTT or bialaphos) resistance. {ECO:0000269|PubMed:16453790}.	response to antibiotic [GO:0046677]; response to herbicide [GO:0009635]	N-acetyltransferase activity [GO:0008080]; phosphinothricin N-acetyltransferase activity [GO:0102971]		N-acetyltransferase activity [GO:0008080]; phosphinothricin N-acetyltransferase activity [GO:0102971]; response to antibiotic [GO:0046677]; response to herbicide [GO:0009635]		Streptomyces hygroscopicus
P0C0T9	CPSD_STRAG	reviewed	Tyrosine-protein kinase CpsD (EC 2.7.10.2)	cpsD cpsIaD	229	FUNCTION: Involved in the regulation of capsular polysaccharide biosynthesis. Autophosphorylation of CpsD attenuates its activity and reduces the level of encapsulation. May be part of a complex that directs the coordinated polymerization and export to the cell surface of the capsular polysaccharide (By similarity). {ECO:0000250}.	capsule polysaccharide biosynthetic process [GO:0045227]	ATP binding [GO:0005524]; non-membrane spanning protein tyrosine kinase activity [GO:0004715]		ATP binding [GO:0005524]; non-membrane spanning protein tyrosine kinase activity [GO:0004715]; capsule polysaccharide biosynthetic process [GO:0045227]		Streptococcus agalactiae
P38054	CUSA_ECOLI	reviewed	Cation efflux system protein CusA	cusA ybdE b0575 JW0564	1047	FUNCTION: Part of a cation efflux system that mediates resistance to copper and silver. {ECO:0000269|PubMed:11399769, ECO:0000269|PubMed:12813074}.	cellular copper ion homeostasis [GO:0006878]; copper ion export [GO:0060003]; detoxification of copper ion [GO:0010273]; plasma membrane copper ion transport [GO:0015679]; response to copper ion [GO:0046688]; response to silver ion [GO:0010272]; silver ion transport [GO:0015673]	copper ion binding [GO:0005507]; copper ion transmembrane transporter activity [GO:0005375]; silver ion transmembrane transporter activity [GO:0015080]	integral component of membrane [GO:0016021]; plasma membrane [GO:0005886]	integral component of membrane [GO:0016021]; plasma membrane [GO:0005886]; copper ion binding [GO:0005507]; copper ion transmembrane transporter activity [GO:0005375]; silver ion transmembrane transporter activity [GO:0015080]; cellular copper ion homeostasis [GO:0006878]; copper ion export [GO:0060003]; detoxification of copper ion [GO:0010273]; plasma membrane copper ion transport [GO:0015679];…		Escherichia coli (strain K12)
P77239	CUSB_ECOLI	reviewed	Cation efflux system protein CusB	cusB ylcD b0574 JW0563	407	FUNCTION: Part of a cation efflux system that mediates resistance to copper and silver. {ECO:0000269|PubMed:11399769, ECO:0000269|PubMed:12813074}.	cellular copper ion homeostasis [GO:0006878]; copper ion export [GO:0060003]; detoxification of copper ion [GO:0010273]; plasma membrane copper ion transport [GO:0015679]; response to copper ion [GO:0046688]; response to silver ion [GO:0010272]	copper ion binding [GO:0005507]; copper ion transmembrane transporter activity [GO:0005375]; transition metal ion binding [GO:0046914]	membrane [GO:0016020]; outer membrane-bounded periplasmic space [GO:0030288]	membrane [GO:0016020]; outer membrane-bounded periplasmic space [GO:0030288]; copper ion binding [GO:0005507]; copper ion transmembrane transporter activity [GO:0005375]; transition metal ion binding [GO:0046914]; cellular copper ion homeostasis [GO:0006878]; copper ion export [GO:0060003]; detoxification of copper ion [GO:0010273]; plasma membrane copper ion transport [GO:0015679]; response to c…		Escherichia coli (strain K12)
P77211	CUSC_ECOLI	reviewed	Cation efflux system protein CusC	cusC ibeB ylcB b0572 JW0561	457	FUNCTION: Forms pores that allow passive diffusion of cations across the outer membrane. Part of a cation efflux system that mediates resistance to copper and silver. In pathogenic strains it allows the bacteria to invade brain microvascular endothelial cells (BMEC) thus allowing it to cross the blood-brain barrier and cause neonatal meningitis. {ECO:0000269|PubMed:11399769, ECO:0000269|PubMed:12…	cellular copper ion homeostasis [GO:0006878]; copper ion export [GO:0060003]; detoxification of copper ion [GO:0010273]; protein homotrimerization [GO:0070207]; protein palmitoylation [GO:0018345]; response to copper ion [GO:0046688]; response to silver ion [GO:0010272]	copper ion binding [GO:0005507]; copper ion transmembrane transporter activity [GO:0005375]; diacylglycerol binding [GO:0019992]; porin activity [GO:0015288]	cell outer membrane [GO:0009279]; pore complex [GO:0046930]	cell outer membrane [GO:0009279]; pore complex [GO:0046930]; copper ion binding [GO:0005507]; copper ion transmembrane transporter activity [GO:0005375]; diacylglycerol binding [GO:0019992]; porin activity [GO:0015288]; cellular copper ion homeostasis [GO:0006878]; copper ion export [GO:0060003]; detoxification of copper ion [GO:0010273]; protein homotrimerization [GO:0070207]; protein palmitoyla…		Escherichia coli (strain K12)
P77214	CUSF_ECOLI	reviewed	Cation efflux system protein CusF	cusF cusX ylcC b0573 JW0562	110	FUNCTION: Part of a cation efflux system that mediates resistance to copper and silver. Binds one copper per polypeptide. {ECO:0000269|PubMed:11399769}.	cellular copper ion homeostasis [GO:0006878]; detoxification of copper ion [GO:0010273]; response to copper ion [GO:0046688]; response to silver ion [GO:0010272]; response to zinc ion [GO:0010043]	copper chaperone activity [GO:0016531]; copper ion binding [GO:0005507]; metallochaperone activity [GO:0016530]; transition metal ion binding [GO:0046914]	outer membrane-bounded periplasmic space [GO:0030288]; periplasmic space [GO:0042597]	outer membrane-bounded periplasmic space [GO:0030288]; periplasmic space [GO:0042597]; copper chaperone activity [GO:0016531]; copper ion binding [GO:0005507]; metallochaperone activity [GO:0016530]; transition metal ion binding [GO:0046914]; cellular copper ion homeostasis [GO:0006878]; detoxification of copper ion [GO:0010273]; response to copper ion [GO:0046688]; response to silver ion [GO:001…		Escherichia coli (strain K12)
P0ACZ8	CUSR_ECOLI	reviewed	Transcriptional regulatory protein CusR	cusR ylcA b0571 JW0560	227	FUNCTION: Member of the two-component regulatory system CusS/CusR. Activates the expression of cusCFBA and plasmid pRJ1004 gene pcoE in response to increasing levels of copper ions, and probably silver ions. Can also increase the basal-level expression of copper resistance gene operon pcoABCD. {ECO:0000269|PubMed:11004187, ECO:0000269|PubMed:11399769}.	phosphorelay signal transduction system [GO:0000160]; positive regulation of gene expression [GO:0010628]; regulation of transcription, DNA-templated [GO:0006355]; response to copper ion [GO:0046688]; transcription, DNA-templated [GO:0006351]	DNA binding [GO:0003677]; identical protein binding [GO:0042802]	cytoplasm [GO:0005737]	cytoplasm [GO:0005737]; DNA binding [GO:0003677]; identical protein binding [GO:0042802]; phosphorelay signal transduction system [GO:0000160]; positive regulation of gene expression [GO:0010628]; regulation of transcription, DNA-templated [GO:0006355]; response to copper ion [GO:0046688]; transcription, DNA-templated [GO:0006351]		Escherichia coli (strain K12)
P0A1Q4	DNAB_SALTY	reviewed	Replicative DNA helicase (EC 3.6.4.12)	dnaB STM4246	471	FUNCTION: Participates in initiation and elongation during chromosome replication; it exhibits DNA-dependent ATPase activity and contains distinct active sites for ATP binding, DNA binding, and interaction with DnaC protein, primase, and other prepriming proteins.	DNA replication, synthesis of RNA primer [GO:0006269]; DNA unwinding involved in DNA replication [GO:0006268]	ATP binding [GO:0005524]; DNA binding [GO:0003677]; DNA helicase activity [GO:0003678]	cytosol [GO:0005829]; primosome complex [GO:1990077]	cytosol [GO:0005829]; primosome complex [GO:1990077]; ATP binding [GO:0005524]; DNA binding [GO:0003677]; DNA helicase activity [GO:0003678]; DNA replication, synthesis of RNA primer [GO:0006269]; DNA unwinding involved in DNA replication [GO:0006268]		Salmonella typhimurium (strain LT2 / SGSC1412 / ATCC 700720)
A0R628	GLFT2_MYCS2	reviewed	Galactofuranosyltransferase GlfT2 (GalTr 2) (EC 2.4.1.288) (Arabinogalactan galactosyltransferase 2) (Galactofuranosylgalactofuranosylrhamnosyl-N-acetylglucosaminyl-diphospho-decaprenol beta-1,5/1,6-galactofuranosyltransferase) (Polymerizing galactofuranosyltransferase GlfT2)	glfT2 MSMEG_6403 MSMEI_6235	646	FUNCTION: Involved in the galactan polymerization of the arabinogalactan (AG) region of the mycolylarabinogalactan-peptidoglycan (mAGP) complex, an essential component of the mycobacteria cell wall. Thus, successively transfers approximately 28 galactofuranosyl (Galf) residues from UDP-galactofuranose (UDP-Galf) onto the galactofuranosyl-galactofuranosyl-rhamnosyl-GlcNAc-diphospho-decaprenol (Gal…	capsule polysaccharide biosynthetic process [GO:0045227]; cell wall macromolecule biosynthetic process [GO:0044038]; cell wall organization [GO:0071555]	metal ion binding [GO:0046872]; transferase activity [GO:0016740]; transferase activity, transferring glycosyl groups [GO:0016757]	plasma membrane [GO:0005886]	plasma membrane [GO:0005886]; metal ion binding [GO:0046872]; transferase activity [GO:0016740]; transferase activity, transferring glycosyl groups [GO:0016757]; capsule polysaccharide biosynthetic process [GO:0045227]; cell wall macromolecule biosynthetic process [GO:0044038]; cell wall organization [GO:0071555]		Mycobacterium smegmatis (strain ATCC 700084 / mc(2)155)
P03013	HIN_SALTY	reviewed	DNA-invertase hin	hin STM2772	190	FUNCTION: A DNA fragment of approximately 900 base pairs, adjacent to the fljB (H2) gene, which specifies the synthesis of phase-2 flagellin, can exist in either orientation with respect to fljB. The orientation of the inversion region controls expression of fljB. The hin gene occupies about two-thirds of the inversion region; it is required for the inversion of the fljB controlling region.	DNA integration [GO:0015074]	DNA binding [GO:0003677]; recombinase activity [GO:0000150]		DNA binding [GO:0003677]; recombinase activity [GO:0000150]; DNA integration [GO:0015074]		Salmonella typhimurium (strain LT2 / SGSC1412 / ATCC 700720)
P0AFS9	MEPM_ECOLI	reviewed	Murein DD-endopeptidase MepM (EC 3.4.24.-) (Murein hydrolase MepM) (ORFU)	mepM yebA b1856 JW5304	440	FUNCTION: A murein DD-endopeptidase with specificity for D-Ala-meso-diaminopimelic acid (mDAP) cross-links. Its role is probably to cleave D-Ala-mDAP cross-links to allow insertion of new glycans and thus cell wall expansion. Functionally redundant with MepM and MepH. Partially suppresses an mepS disruption mutant. {ECO:0000269|PubMed:23062283}.	autolysis [GO:0001896]; capsule polysaccharide biosynthetic process [GO:0045227]; cell separation after cytokinesis [GO:0000920]; cell wall organization [GO:0071555]; peptidoglycan metabolic process [GO:0000270]	endopeptidase activity [GO:0004175]; metal ion binding [GO:0046872]; metalloendopeptidase activity [GO:0004222]	integral component of membrane [GO:0016021]; plasma membrane [GO:0005886]	integral component of membrane [GO:0016021]; plasma membrane [GO:0005886]; endopeptidase activity [GO:0004175]; metal ion binding [GO:0046872]; metalloendopeptidase activity [GO:0004222]; autolysis [GO:0001896]; capsule polysaccharide biosynthetic process [GO:0045227]; cell separation after cytokinesis [GO:0000920]; cell wall organization [GO:0071555]; peptidoglycan metabolic process [GO:0000270]		Escherichia coli (strain K12)
Q47454	PCOC_ECOLX	reviewed	Copper resistance protein C	pcoC	126	FUNCTION: Required for the copper-inducible expression of copper resistance.	copper ion transport [GO:0006825]; response to copper ion [GO:0046688]	copper ion binding [GO:0005507]	periplasmic space [GO:0042597]	periplasmic space [GO:0042597]; copper ion binding [GO:0005507]; copper ion transport [GO:0006825]; response to copper ion [GO:0046688]		Escherichia coli
P24219	RP54_BACSU	reviewed	RNA polymerase sigma-54 factor	sigL BSU34200	436	FUNCTION: Sigma factors are initiation factors that promote the attachment of RNA polymerase to specific initiation sites and are then released. This sigma factor is responsible for the expression of the levanase operon. The open complex (sigma-54 and core RNA polymerase) serves as the receptor for receipt of the melting signal from the remotely bound activator protein LevR for the expression of …	DNA-templated transcription, initiation [GO:0006352]	DNA binding [GO:0003677]; DNA-directed 5'-3' RNA polymerase activity [GO:0003899]; sigma factor activity [GO:0016987]; transcription factor activity, sequence-specific DNA binding [GO:0003700]		DNA binding [GO:0003677]; DNA-directed 5'-3' RNA polymerase activity [GO:0003899]; sigma factor activity [GO:0016987]; transcription factor activity, sequence-specific DNA binding [GO:0003700]; DNA-templated transcription, initiation [GO:0006352]		Bacillus subtilis (strain 168)
Q8ZQC8	SOPD2_SALTY	reviewed	Secreted effector protein sopD2 (Salmonella outer protein D 2)	sopD2 STM0972	319	FUNCTION: Effector proteins function to alter host cell physiology and promote bacterial survival in host tissues. Contributes to the formation of Salmonella-induced filaments (Sifs) in infected epithelial cells and to replication in macrophages. {ECO:0000269|PubMed:15554961}.	pathogenesis [GO:0009405]; protein secretion by the type III secretion system [GO:0030254]		extracellular region [GO:0005576]; host cell membrane [GO:0033644]; host cell plasma membrane [GO:0020002]; membrane [GO:0016020]	extracellular region [GO:0005576]; host cell membrane [GO:0033644]; host cell plasma membrane [GO:0020002]; membrane [GO:0016020]; pathogenesis [GO:0009405]; protein secretion by the type III secretion system [GO:0030254]		Salmonella typhimurium (strain LT2 / SGSC1412 / ATCC 700720)
